# Supplementary material for: A Bacterial Form I’ Rubisco Has a Smaller Carbon Isotope Fractionation than Its Form I Counterpart
Source: MDPI journal article supplement (doi:10.3390/biom13040596), 2023-03-26
Supplement: s1 [file s1]

## Supplementary Materials

**Table S1.** Results of rubisco KIE assay.

| Rubisco                       | Time (min) | $\delta^{13}\text{C}$ (avg.) | $\delta^{13}\text{C}$ (std. err.) | $^{13}\text{R}$ (avg.) | $^{13}\text{R}$ (std. err.) |
|-------------------------------|------------|------------------------------|-----------------------------------|------------------------|-----------------------------|
| L <sub>8</sub>                | 0          | −0.592                       | 0.010                             | 0.0111549              | 1.81*10 <sup>−7</sup>       |
| L <sub>8</sub>                | 15         | −0.425                       | 0.007                             | 0.0111580              | 1.24*10 <sup>−7</sup>       |
| L <sub>8</sub>                | 30         | −0.129                       | 0.021                             | 0.0111634              | 3.92*10 <sup>−7</sup>       |
| L <sub>8</sub>                | 45         | 0.111                        | 0.026                             | 0.0111679              | 4.80*10 <sup>−7</sup>       |
| L <sub>8</sub>                | 60         | 0.268                        | 0.017                             | 0.0111708              | 3.11*10 <sup>−7</sup>       |
| L <sub>8</sub>                | 90         | 0.327                        | 0.010                             | 0.0111718              | 1.81*10 <sup>−7</sup>       |
| L <sub>8</sub>                | 120        | 0.506                        | 0.007                             | 0.0111751              | 1.35*10 <sup>−7</sup>       |
| L <sub>8</sub>                | 150        | 0.473                        | 0.012                             | 0.0111745              | 1.35*10 <sup>−7</sup>       |
| L <sub>8</sub>                | 210        | 0.652                        | 0.013                             | 0.0111778              | 2.34*10 <sup>−7</sup>       |
| L <sub>8</sub>                | 270        | 0.454                        | 0.007                             | 0.0111742              | 1.26*10 <sup>−7</sup>       |
| L <sub>8</sub>                | 330        | 0.399                        | 0.006                             | 0.0111732              | 1.08*10 <sup>−7</sup>       |
| L <sub>8</sub>                | 390        | 0.348                        | 0.014                             | 0.0111722              | 2.55*10 <sup>−7</sup>       |
| L <sub>8</sub> S <sub>8</sub> | 0          | 0.599                        | 0.026                             | 0.0111768              | 4.68*10 <sup>−7</sup>       |
| L <sub>8</sub> S <sub>8</sub> | 15         | 0.990                        | 0.017                             | 0.0111840              | 3.14*10 <sup>−7</sup>       |
| L <sub>8</sub> S <sub>8</sub> | 30         | 1.058                        | 0.008                             | 0.0111853              | 1.53*10 <sup>−7</sup>       |
| L <sub>8</sub> S <sub>8</sub> | 45         | 1.553                        | 0.015                             | 0.0111944              | 2.69*10 <sup>−7</sup>       |
| L <sub>8</sub> S <sub>8</sub> | 60         | 1.490                        | 0.010                             | 0.0111932              | 1.84*10 <sup>−7</sup>       |
| L <sub>8</sub> S <sub>8</sub> | 90         | 1.776                        | 0.015                             | 0.0111985              | 2.82*10 <sup>−7</sup>       |
| L <sub>8</sub> S <sub>8</sub> | 120        | 1.905                        | 0.013                             | 0.0112009              | 2.33*10 <sup>−7</sup>       |
| L <sub>8</sub> S <sub>8</sub> | 150        | 1.997                        | 0.011                             | 0.0112025              | 1.92*10 <sup>−7</sup>       |
| L <sub>8</sub> S <sub>8</sub> | 210        | 1.951                        | 0.009                             | 0.0112017              | 1.64*10 <sup>−7</sup>       |
| L <sub>8</sub> S <sub>8</sub> | 270        | 1.948                        | 0.008                             | 0.0112016              | 1.44*10 <sup>−7</sup>       |

Experimental outputs of rubisco KIE assay;  $\delta^{13}\text{C}$  vs. time is plotted in Figure S1A. Average  $\delta^{13}\text{C}$  or  $^{13}\text{R}$  ( $n = 10$  analytical replicates) is reported with standard error (standard deviation divided by square root of  $n$ ).

**Table S2.** Literature compilation of data used to make Figure 1A.

| Strain                          | Form | Phylum        | Specificity | KIE                | Notes                                                         | Specificity Reference | KIE Reference |
|---------------------------------|------|---------------|-------------|--------------------|---------------------------------------------------------------|-----------------------|---------------|
| Prochlorococcus marinus MIT9313 | IA   | Cyanobacteria | 59.9 ± 7.0  | 24.0 [22.2, 25.6]a | pH 7.5, 25 mM MgCl <sub>2</sub> , 25°C, expressed from E coli | [54]                  | [24]          |

|                                  |    |                |            |               |                                                                                |      |            |
|----------------------------------|----|----------------|------------|---------------|--------------------------------------------------------------------------------|------|------------|
| Synechococcus elongatus PCC6301  | IB | Cyanobacteria  | 56.1 ± 1.3 | 22.42 ± 2.37b | pH 8.49, 30 mM MgCl <sub>2</sub> , 22C, expressed from E coli                  | [30] | This paper |
| Synechococcus elongatus PCC6301  | IB | Cyanobacteria  | 50.3 ± 2.0 | 25.18 ± 0.31b | pH 8.38, 30 mM MgCl <sub>2</sub> , 22C, expressed from E coli                  | [54] | [50]       |
| Synechococcus elongatus PCC6301  | IB | Cyanobacteria  | 42.7 ± 2.8 | 22.0 ± 0.2c   | pH 8.1, 25 mM Mg(2+), 25C, expressed from E coli                               | [55] | [25]       |
| Candidatus Promineofilum breve   | I' | Chloroflexi    | 36.1 ± 0.9 | 16.25 ± 1.36b | pH 8.52, 30 mM MgCl <sub>2</sub> , 22C, expressed from E coli                  | [30] | This paper |
| Rhodospirillum rubrum            | II | Proteobacteria | 12.5 ± 0.6 | 23.0 ± 0.6c   | pH 7.9, 25 mM Mg(2+), 25C, expressed from E coli                               | [55] | [25]       |
| Rhodospirillum rubrum            | II | Proteobacteria | 12.5 ± 0.6 | 19.6 ± 0.4c   | pH 7.9, 2 mM Mg(2+), 25C, expressed from E coli                                | [55] | [25]       |
| Rhodospirillum rubrum            | II | Proteobacteria | 12.5 ± 0.6 | 22.2 ± 2.1b   | pH 8.0, 20 mM MgCl <sub>2</sub> , room temp?, expressed from E coli (XL1-blue) | [55] | [52]       |
| Rhodospirillum rubrum            | II | Proteobacteria | 12.5 ± 0.6 | 17.8 ± 0.8b   | pH 7.8, 10 mM MgCl <sub>2</sub> , 25C, "gift from John Schloss"                | [55] | [53]       |
| Candidatus Endorifita persephone | II | Proteobacteria | 8.6 ± 0.9  | 19.5 ± 1.0c   | pH 8.0, 30C, 5 mM MgCl <sub>2</sub> , purified from R pachyptila trophosomes   | [44] | [44]       |

For KIE measurements: Each figure reports uncertainty on the measurement in a different way; superscripts indicate: *a* 95% confidence interval; *b* standard deviation; *c* standard error. Strains for *R. rubrum* not specified in [25,52,53]. We only used data where a pure enzyme, substrate-depletion assay like ours was done. In addition, we only used data from well-characterized strains where rubisco was obtained through expression in *E. coli*. Therefore, we are not including the [46] measurement because it was done in a tobacco plant mutant expressing an *R. rubrum* rubisco sequence *in vivo*, and KIE was calculated by extrapolating to a ratio of intercellular to ambient CO<sub>2</sub> (C<sub>i</sub>/C<sub>a</sub>) of

1. In addition, we are only showing Form IA/B data from Cyanobacteria and therefore do not include plants or the *Solemya velum* symbiont [36]. Assay temperature was assumed to be room temperature for [52]; rubisco was assumed to be expressed from *E. coli* in [53]. In addition, only the pH 7.9, 25 mM Mg<sup>2+</sup> condition from [25] was plotted in Figure 1B. See Table 3 in [13] for a recent compilation of all measured KIEs. For Specificity measurements: Most specificity values were not reported with the study, with the exception of this paper and [44,50]. Therefore, specificity values were taken from [30,54] where indicated.

**Table S3.** Additional Specificity and KIE values used for Figure 1B.

| Strain                  | Form | Specificity | KIE (%)           | Specificity Reference | KIE Reference |
|-------------------------|------|-------------|-------------------|-----------------------|---------------|
| Ralstonia eutropha      | IC   | 75          | 19 [17.5, 20.4]   | [56]                  | [37]          |
| Rhodobacter sphaeroides | IC   | 60          | 22.4 [21.1, 24.0] | [56]                  | [37]          |
| Emiliana huxleyi        | ID   | 79          | 11.1 [9.8, 12.6]  | [57]                  | [61]          |
| Skeletonema costatum    | ID   | 72.2 ± 2.2  | 18.5 [17.0, 19.9] | [58]                  | [62]          |
| Spinacia oleracea       | IB   | 77.2 ± 1.4  | 30.3 ± 0.8        | [59]                  | [25]          |
| Spinacia oleracea       | IB   | 77.2 ± 1.4  | 29 ± 1            | [59]                  | [63]          |
| Spinacia oleracea       | IB   | 77.2 ± 1.4  | 28.2 [26.6, 29.8] | [59]                  | [36]          |
| Nicotiana tabacum       | IB   | 82.1 ± 0.8  | 27.4 ± 0.9        | [60]                  | [52]          |

Data compilation is similar to that used in Figure 4 from [37]. Most specificity values were measured separate from the KIE and are taken from other prior literature [56–60], similar to what was done by [37]. *Solemya velum* gill symbiont (Form IA, KIE = 24.4‰) from [36] was not included because the specificity could not be found. In addition, [25] gives two values at two different assay conditions for *S. oleracea*; here we use the value at pH 8.5, 20 mM MgCl<sub>2</sub> but they also report a KIE of 29.0 ± 0.3‰ at pH 7.6, 5 mM Mg<sup>2+</sup>. KIE values are from [25,36,37,52,61–63]. Error in brackets is reported as mean with 95% confidence intervals; otherwise error is reported as mean ± s.e.

**Table S4.** Model outputs for converting time to *f*.

| Rubisco                       | Parameter | Estimate                | Std. Error             | t value  | Pr(> t )              | Signif. Code |
|-------------------------------|-----------|-------------------------|------------------------|----------|-----------------------|--------------|
| L <sub>8</sub> S <sub>8</sub> | a         | −2.786*10 <sup>−5</sup> | 2.759*10 <sup>−6</sup> | −10.097  | 1.63*10 <sup>−4</sup> | ***          |
| L <sub>8</sub> S <sub>8</sub> | b         | 1.640*10 <sup>−2</sup>  | 4.310*10 <sup>−3</sup> | 3.804    | 0.012573              | *            |
| L <sub>8</sub> S <sub>8</sub> | c         | 1.120*10 <sup>−2</sup>  | 2.908*10 <sup>−6</sup> | 3852.671 | < 2*10 <sup>−16</sup> | ***          |
| L <sub>8</sub>                | a         | −2.338*10 <sup>−5</sup> | 1.369*10 <sup>−6</sup> | −17.072  | 2.58*10 <sup>−6</sup> | ***          |
| L <sub>8</sub>                | b         | 1.769*10 <sup>−2</sup>  | 2.767*10 <sup>−3</sup> | 6.392    | 6.90*10 <sup>−4</sup> | ***          |
| L <sub>8</sub>                | c         | 1.118*10 <sup>−2</sup>  | 1.203*10 <sup>−6</sup> | 9291.937 | < 2*10 <sup>−16</sup> | ***          |

The nonlinear least squares function in R Statistical Software was used for calculation with initial guesses of a = −1\*10<sup>−5</sup>, b = 0.1, c = 0.01 for L<sub>8</sub>S<sub>8</sub>; a = −1\*10<sup>−4</sup>, b = 0.1, c = 0.01 for L<sub>8</sub>. The parameter *c* gives R<sub>upper</sub> in Equation 1, which then allows time to be converted to *f*. For L<sub>8</sub>S<sub>8</sub>, the model found a residual standard error of 1.252\*10<sup>−6</sup> on 6 degrees of freedom, required 5 iterations to convergence, and achieved a convergence tolerance of 1.405\*10<sup>−6</sup>. For L<sub>8</sub>, the model found a residual standard error of 1.252\*10<sup>−6</sup> on 6 degrees of freedom, required 5 iterations to convergence, and achieved a convergence tolerance of 1.405\*10<sup>−6</sup>. The significant codes indicate: 0 '\*\*\*' 0.001 '\*\*' 0.01 '\*' 0.05 '.' 0.1 ' ' 1. All analyses were performed using R Statistical Software (v4.1.0; R Core Team 2021, [41]).

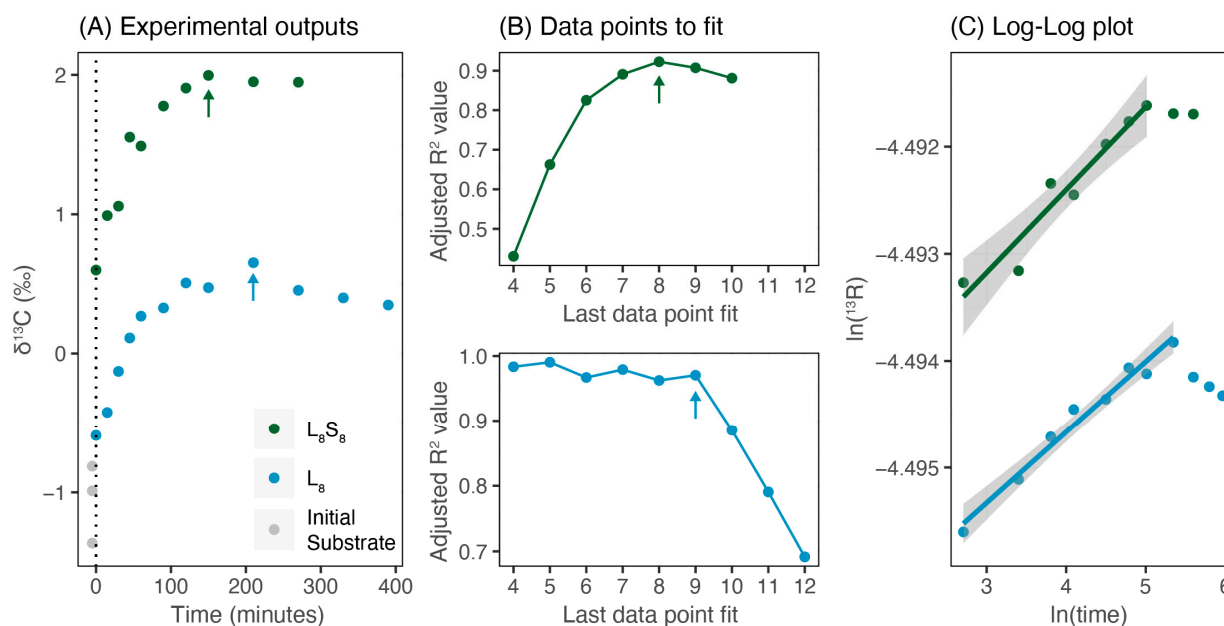

**Figure S1.** Data preprocessing step. A) Experimental outputs of rubisco KIE assay, showing how the  $\delta^{13}\text{C}$  of the  $\text{CO}_2$  headspace evolves over the experiment. The first time point taken is shown at 0 minutes, and the initial  $\text{NaHCO}_3$  substrate is shown plotted at -5 minutes for ease of comparison. The arrow indicates the final data point to fit after preprocessing. B) Subplots showing the adjusted  $R^2$  value for the  $\text{L}_8\text{S}_8$  (above, green) and the  $\text{L}_8$  rubisco (below, blue) for linear regressions across different lengths of log-transformed data points. Arrows indicate where the  $R^2$  value starts to decrease (point 8 for  $\text{L}_8\text{S}_8$  rubisco in green; point 9 for  $\text{L}_8$  rubisco in blue); these arrows refer to the same point in Panel A. C) Linear regression across natural log-transformed data to data point 8 for the  $\text{L}_8\text{S}_8$  rubisco (green) and to data point 9 for the  $\text{L}_8$  rubisco (blue). Note the isotopic data is in  $^{13}\text{R}$  vs.  $\delta^{13}\text{C}$  format. The first data point is not plotted because the natural log of zero is undefined. All analyses were performed using R Statistical Software (v4.1.0; R Core Team 2021, [41]). Data visualization was performed using the *ggplot2* package (v3.3.6; Wickham, 2016, [64]).

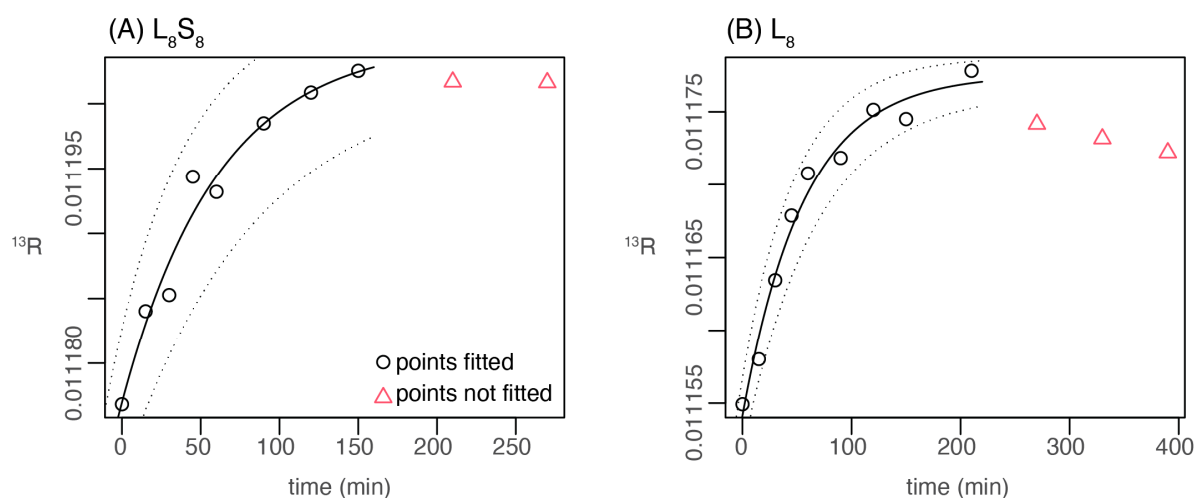

**Figure S2.** Calculating  $f$  from time. Plots showing best fit exponential model for (A)  $\text{L}_8\text{S}_8$  vs. (B)  $\text{L}_8$  rubisco in solid black line. Dotted lines indicate model uncertainty (std. dev.). See Table S3 for best-fit model parameters. Open black circles are points fitted, as determined in Figure S1. Open red

triangles are the points not fit. All analyses and data visualization were performed using R Statistical Software (v4.1.0; R Core Team 2021, [41]).

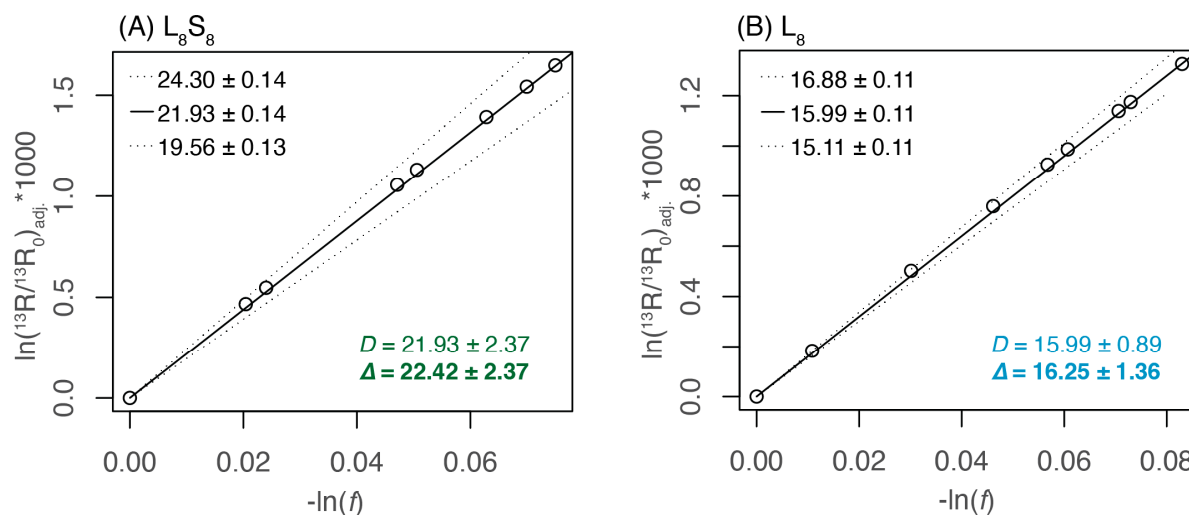

**Figure S3.** Rayleigh plots with equilibrium adjustment. A) and B) show  $\text{L}_8\text{S}_8$  and  $\text{L}_8$  rubisco with equilibrium adjustment for  $^{13}\text{R}$  values (Equation 2; [25]) before linear regression. Solid line gives best fit value using  $f$  values calculated from the best estimate for parameter  $c$ . Dotted lines give fit for  $f$  values calculated using the best estimate  $\pm$  std. error for  $c$  as shown in Table S3. Slopes for each line are reported in the upper left corner (best estimate  $\pm$  std. error).  $D$  is the slope of the solid, best fit line.  $\Delta$  is converted from  $D$  using  $\Delta = D/(1-D/1000)$  [25]. All analyses and data visualization were performed using R Statistical Software (v4.1.0; R Core Team 2021, [41]).
